# Supplementary material
Source: PubMed Central journal article supplement (PMC2459305)
Supplement: M801582200_1.pdf [file M801582200_1.pdf]

## **RECQ1 possesses DNA branch migration activity**

Dmitry V. Bugreev, Robert M. Brosh, Jr., Alexander V. Mazin

### **SUPPORTING ONLINE INFORMATION**

This supplement contains:

Supplementary Figure Legends

Supplementary Figures 1-5

Supplementary Table S1

**SUPPLEMENTARY FIGURE 1. RECQ1 helicase promotes the 3-stranded DNA branch migration in the 3'→5' direction.** *A*, Scheme depicts the 3-stranded branch migration. Mutually heterologous terminal regions are marked by crosses. Unpaired ssDNA regions (4 bases) that arise during branch migration are shown as a bubble. These non-homologous regions were introduced to block spontaneous branch migration. The asterisk indicates <sup>32</sup>P label at the 5'-end DNA. *B*, The DNA products of the branch migration reactions were visualized by electrophoresis in a 8% polyacrylamide gel. Branch migration was initiated by addition of indicated amount of RECQ1 to appropriate DNA substrates followed by incubation for 30 min at 37 °C. In controls, storage buffer was added instead of RECQ1. Lanes 13 and 14 show migration of DNA markers (379\*+379\*/117) and (201\*+201\*/71), respectively. *C*, The data from panel (*B*) presented as a graph.

**SUPPLEMENTARY FIGURE 2. RAD54 protein promotes 3-stranded branch migration in either 3'→5' or 5'→3' directions.** *A*, Scheme depicts 3-stranded branch migration reaction. Mutually heterologous terminal regions are marked by crosses. Non-homologous ssDNA parts arise during branch migration are shown as a bubble (4 bases). These non-homologous regions were introduced to block spontaneous branch migration. The asterisk indicates <sup>32</sup>P label at the 5'-end DNA. *B*, The DNA products of the branch migration promoted by RAD54 were visualized by electrophoresis in a 8% polyacrylamide gel. To prepare substrates that migrate in either 3'→5' or 5'→3' direction, <sup>32</sup>P-labeled DNA intermediates #169\*/71 or #193\*/117 (<sup>32</sup>P-labeled strands marked by asterisk) (32 nM, molecules) were annealed with #201 or #379 oligonucleotides

respectively (48 nM, molecules) by incubating in buffer containing 25 mM Tris acetate, pH 7.5, 2 mM ATP, 5 mM magnesium acetate, 2 mM DTT, BSA (100 µg/ml), 15 mM phosphocreatine and creatine phosphokinase (30 units/ml) for 15 min at 37 °C. Branch migration was initiated by addition of the indicated amounts of RAD54 to the reaction mixture containing branched structures followed by a 30-min incubation at 37 °C. C, The data from panel (B) presented as a graph. Error bars indicate s.e.m.

### SUPPLEMENTARY FIGURE 3. **BLM helicase and RAD54 protein promote 4-**

**stranded branch migration in either 3'→5' or 5'→3' directions.** A, Scheme represents 4-stranded branch migration. Mutually heterologous terminal regions are marked by crosses. Non-homologous ssDNA parts arise during branch migration are shown as a 1 base mismatch. These non-homologous regions were introduced to block spontaneous branch migration. The asterisk indicates <sup>32</sup>P label at the 5'-end DNA. B, The DNA products of the branch migration promoted by BLM were visualized by electrophoresis in a 8% polyacrylamide gel. To prepare substrates <sup>32</sup>P-labeled DNA intermediates #169\*/71 or #193\*/117 (<sup>32</sup>P-labeled strands marked by asterisk) (32 nM, molecules) were mixed with #170/171 or #194/195 oligonucleotides, respectively (48 nM, molecules), and annealed by incubating in buffer containing 25 mM Tris acetate, pH 7.5, 2 mM ATP, 5 mM magnesium acetate, 2 mM DTT, BSA (100 µg/ml), 15 mM phosphocreatine and creatine phosphokinase (30 units/ml) for 15 min at 37 °C. Branch migration was initiated by addition of BLM (10 nM) to the reaction mixture containing branched DNA substrates followed by incubation for indicated periods of time at 37 °C. C, The data from panel (B) presented as a graph. D, The kinetics of 3-stranded branch

migration promoted by human RAD54 protein (50 nM), shown as a graph. Error bars in (C) and (D) indicate s.e.m.

**SUPPLEMENTARY FIGURE 4. ssDNA binding proteins, SSB and RPA, do not affect D-loop dissociation by RECQ1.** *A*, Experimental scheme. The asterisk indicates  $^{32}\text{P}$  label at the 5'-end DNA. *B* and *D*, Dissociation of deproteinized D-loops (150 pM) by RECQ1 helicase (in indicated concentrations) in the presence of SSB (400 nM) or RPA (100 nM) was analyzed in a 1% agarose gel. RECQ1 was added to the D-loop with prebound SSB or RPA protein. The reactions with SSB and RPA were carried out for 30 min at 37 °C in buffers contained 1 mM and 5 mM magnesium acetate, respectively. In reactions with RPA, higher  $\text{Mg}^{2+}$  concentration was used because RPA has its own D-loop disruption activity at lower  $\text{Mg}^{2+}$  concentrations. *C* and *E*, The data from panel (*B* and *D*) are presented as a graph.

**SUPPLEMENTARY FIGURE 5. BLM helicase catalyzes dissociation of the 3'- and 5'-invaded joint molecules (D-loops) with similar efficiency.** *A*, Experimental scheme depicting reaction of dissociation of D-loops formed by the 3'- and 5'-invading ssDNA. The asterisk indicates  $^{32}\text{P}$  label at the 5'-end DNA. *B*, Dissociation of deproteinized D-loops (150 pM) by BLM helicase (in indicated concentrations) was analyzed in a 1% agarose gel. *C*, The data from panel (*B*) are presented as a graph.

**A**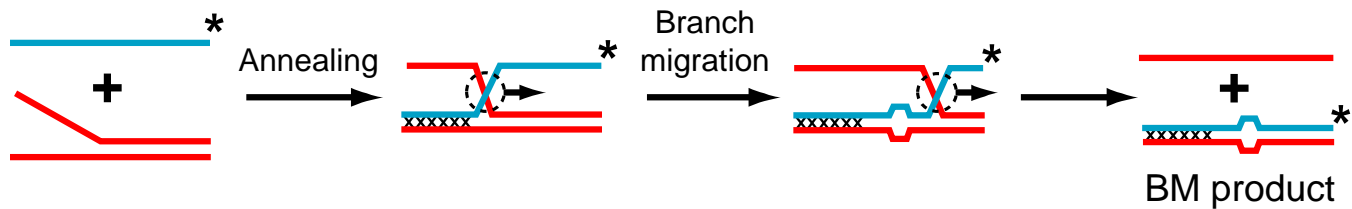**B**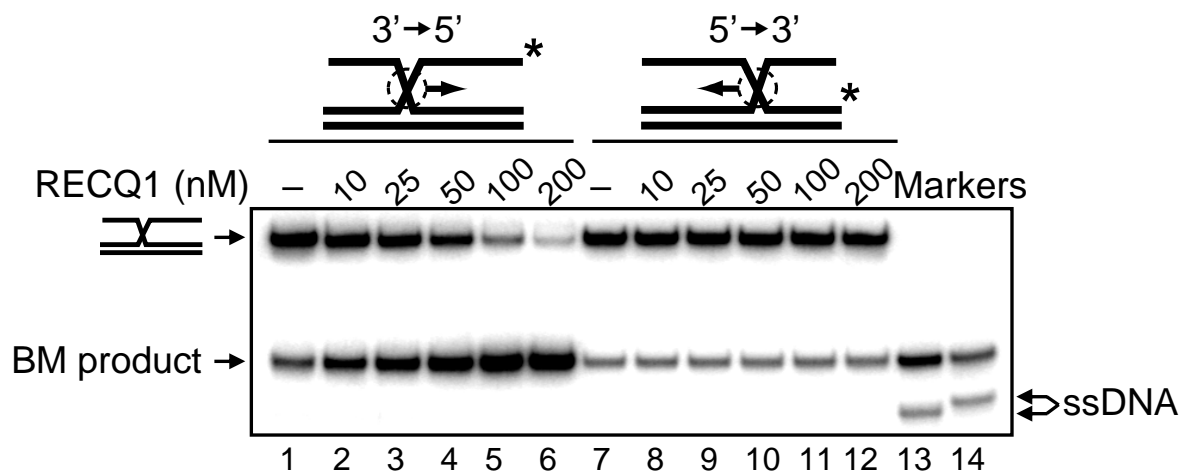**C**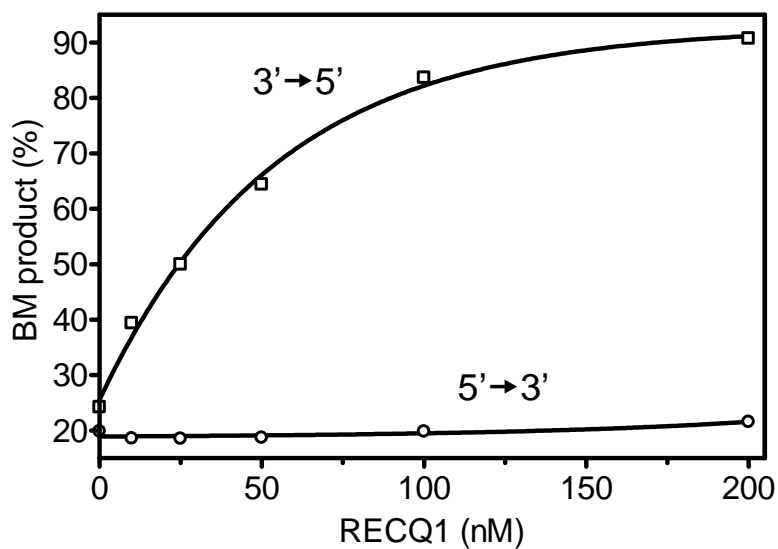

A

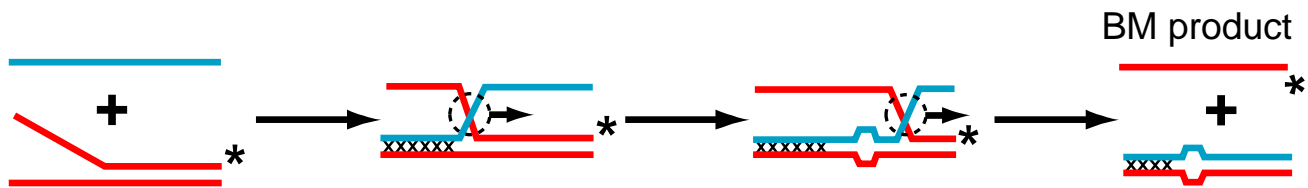

B

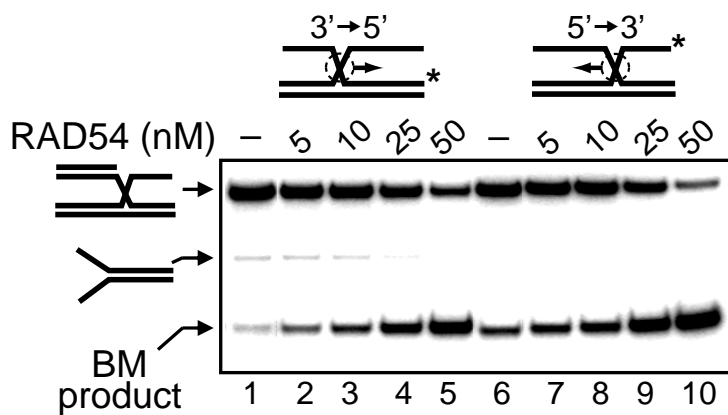

C

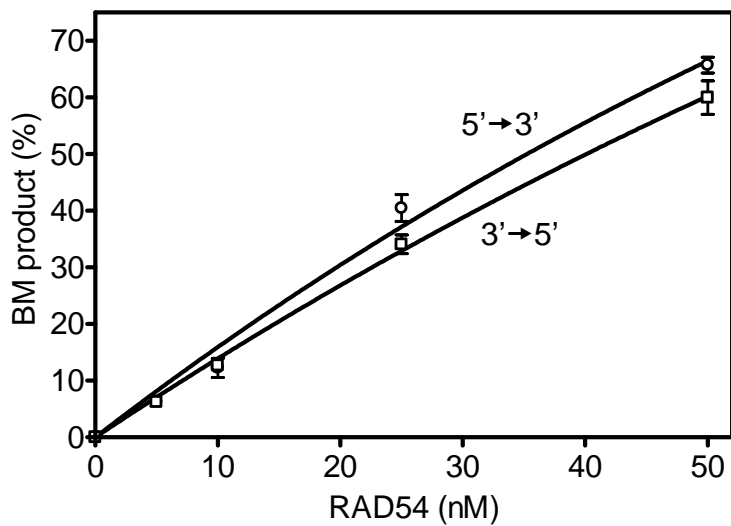

**A**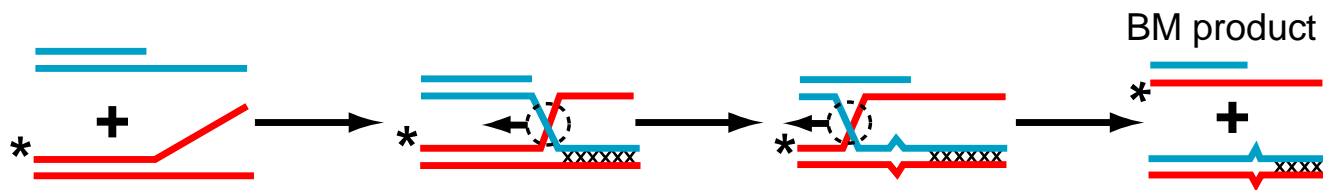**B**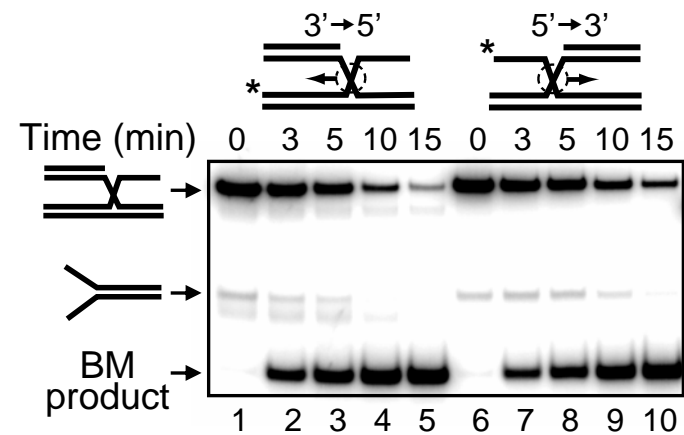**C**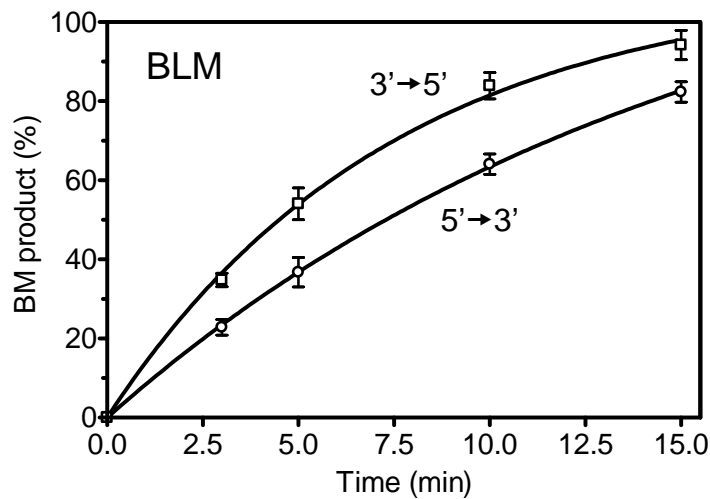**D**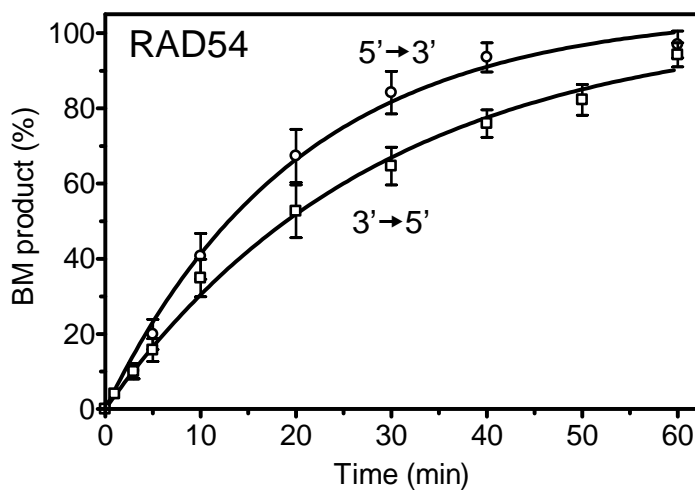

**A**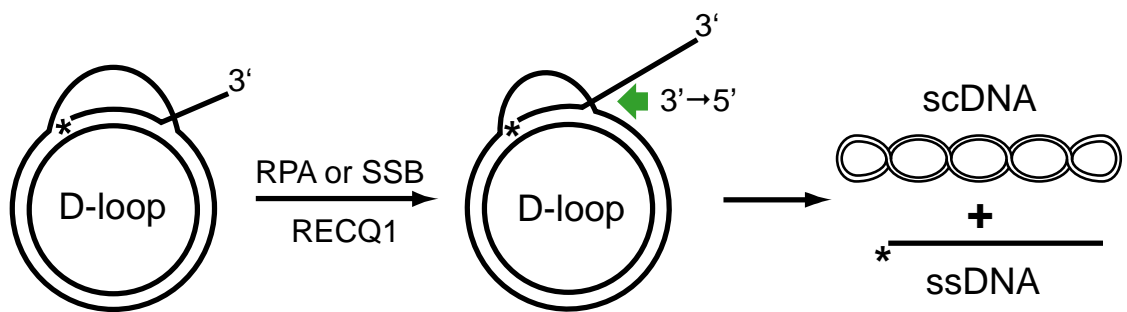**B**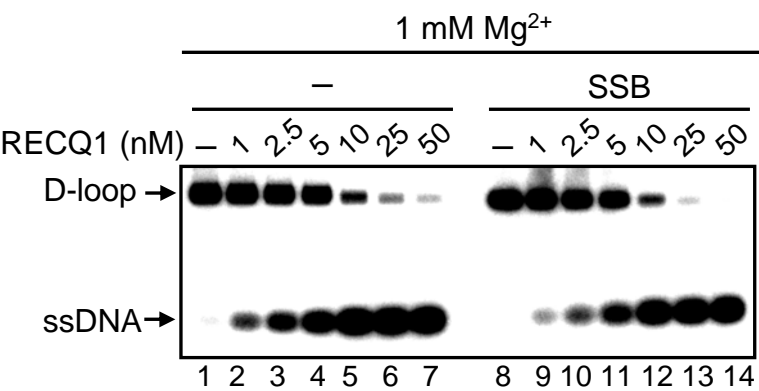**C**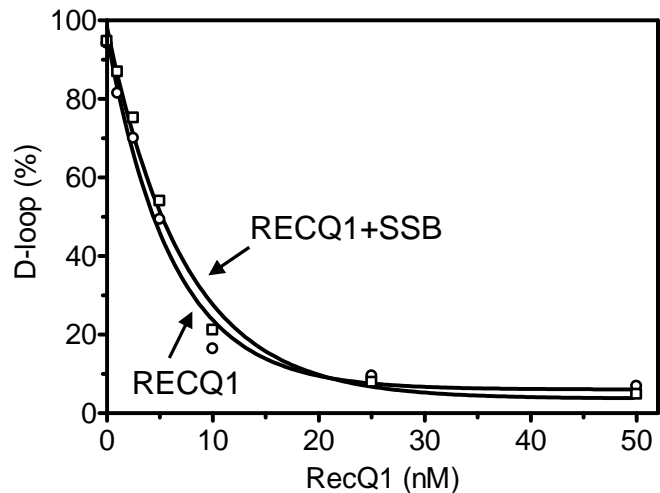**D**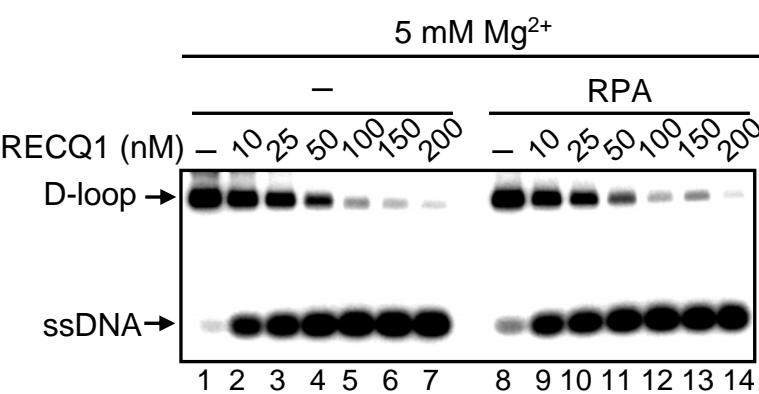**E**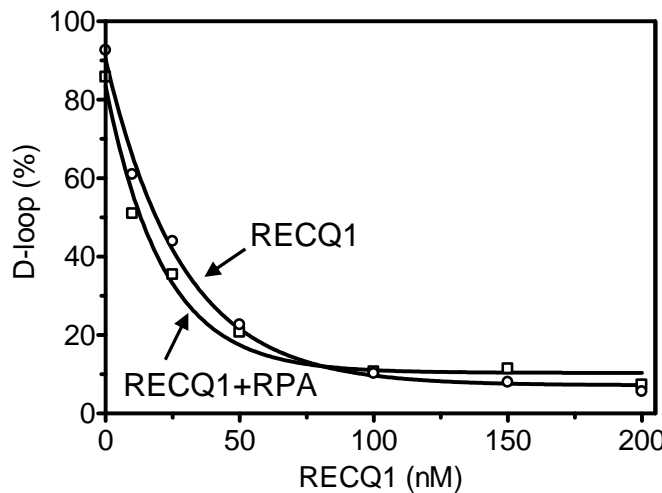



**A**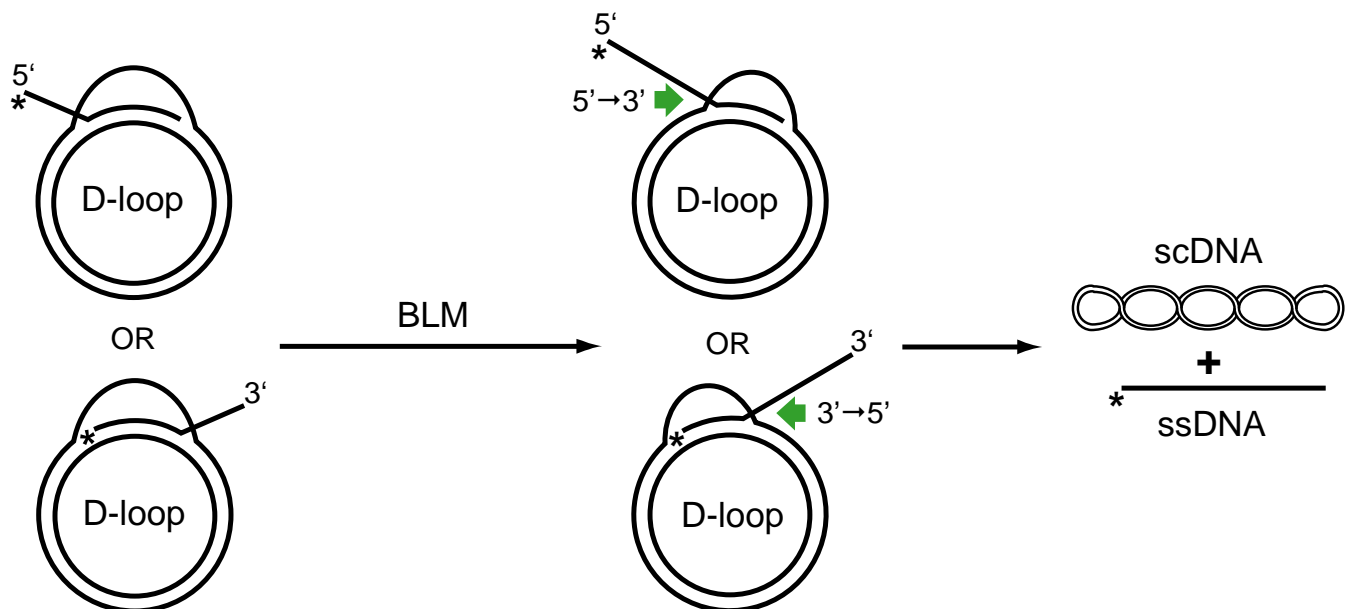**B**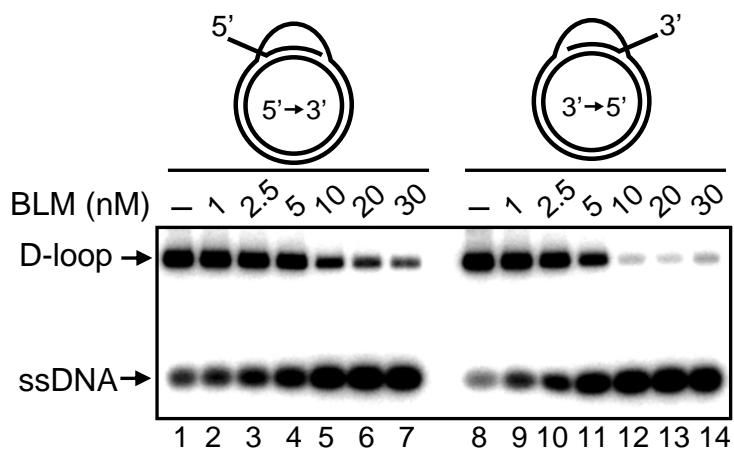**C**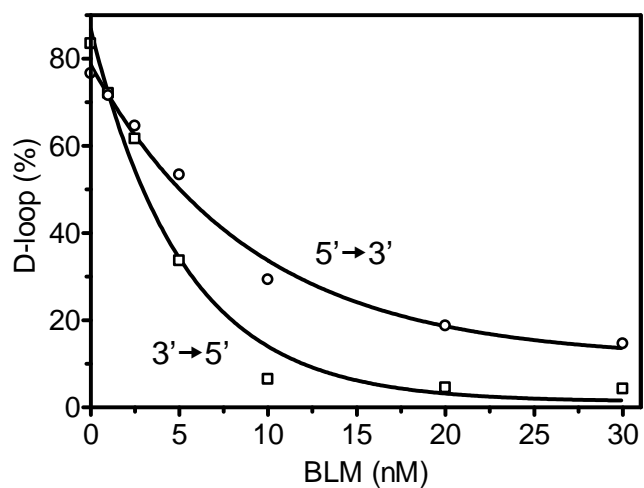

SUPPLEMENTARY TABLE S1. **Sequences of the oligonucleotides used in this study**

| N   | Length,<br>nt | Sequence<br>(5'→3')                                                                                        |
|-----|---------------|------------------------------------------------------------------------------------------------------------|
| 2   | 63            | TCCTTTTGATAAGAGGTCATTTTTCGCGATGGCTTAGAGCTT<br>AATTGCTGAATCTGGTGCTGT                                        |
| 71  | 94            | CTTTAGCTGCATATTTACAACATGTTGACCTACAGCACCAGA<br>TTCAGCAATTAAGCTCTAAGCCATCCGCAAAAATGACCTCTT<br>ATCAAAAGGA     |
| 117 | 94            | TCCTTTTGATAAGAGGTCATTTTTCGCGATGGCTTAGAGCTT<br>AATTGCTGAATCTGGTGCTGTAGGTCAACATGTTGTAAATAT<br>GCAGCTAAAG     |
| 169 | 93            | TCCTTTTGATAAGAGGTCATTTTTCGCGATGGCTTAGAGCTT<br>AATTGCTGAATCTGGTGCTGTTTTTTTTTTTTTTTTTTTTTTTT<br>TTTTTT       |
| 170 | 94            | TCCTTTTGATAAGAGGTCATTTTTCGCGATGGCTTAGAGCTT<br>AATTGCTAAATCTGGTGCTGTAGGTCAACATGTTGTAAATAT<br>GCAGCTAAAG     |
| 171 | 63            | ACAGCACCAGATTTAGCAATTAAGCTCTAAGCCATCCGCAAA<br>AATGACCTCTTATCAAAAGGA                                        |
| 193 | 94            | TTTTTTTTTTTTTTTTTTTTTTTTTTTTTTTTTTCACAGCACCAGATTC<br>AGCAATTAAGCTCTAAGCCATCCGCAAAAATGACCTCTTATC<br>AAAAGGA |
| 194 | 94            | CTTTAGCTGCATATTTACAACATGTTGACCTACAGCACCAGA<br>TTCAGAAATTAAGCTCTAAGCCATCCGCAAAAATGACCTCTT<br>ATCAAAAGGA     |
| 195 | 63            | TCCTTTTGATAAGAGGTCATTTTTCGCGATGGCTTAGAGCTT<br>AATTTCTGAATCTGGTGCTGT                                        |
|     |               |                                                                                                            |

|     |     |                                                                                                                                      |
|-----|-----|--------------------------------------------------------------------------------------------------------------------------------------|
| 196 | 94  | TCCTTTTGATAAGAGGTCATTTTTGCGGATGGCTTAGAGCTT<br>AATTGCTGAATCTGGTGCTGTTGAGAGTGCACCATATGCGG<br>TGTGAAATACC                               |
| 201 | 94  | TCCTTTTGATAAGAGGTCATTTTTGCGGATGGCTTAGAGCTT<br>AATTATAAAATCTGGTGCTGTAGGTCAACATGTTGTAAATATG<br>CAGCTAAAG                               |
| 209 | 100 | AATTCTCATTTTACTTACCGGACGCTATTAGCAGTGGGTGAG<br>CAAAAACAGGAAGGCAAAATGCCGCAAAAAGGGAATAAGG<br>GCGACACGGAAATGTTG                          |
| 248 | 94  | CTGAACGCCATGACTCGACCCACGTACTIONCATAGACTTCAAC<br>TTGCATAAAATCTGGTGCTGTAGGTCAACATGTTGTAAATAT<br>GCAGCTAAAG                             |
| 254 | 124 | TAATATTGAAAAAGGAAGAGTATGAGTATTCAACATTTCCGT<br>GTCGCCCTTATTCCCTTTTTTTCGGCATTTCCTTCCTGTTT<br>TTGCTCACCCAGAAACGCTGGTGAAAGTAAAAGATGCTG   |
| 255 | 124 | CAGCATCTTTTACTTTTACCAGCGTTTCTGAAACGCTGGTCG<br>TCATCCTAGTGGCGAATAAGTGCGCATTCTAGCAAATCCACA<br>TATGGCTGACAACTCATACTCTTCCTTTTTTCAATATTA  |
| 293 | 124 | CAGCATCTTTTACTTTTACCAGCGTTTCTGACATAGCAAAAA<br>CAGGAAGGCAAAATGCCGCAAAAAGGGAATAAGGGCGACA<br>CGGAAATTCGTAATACTCATACTCTTCCTTTTTTCAATATTA |
| 373 | 100 | GGTGAGCAAAAACAGGAAGGCAAAATGCCGCAAAAAGGGA<br>ATAAGGGCGACACGGAAATGTTGAATTCTCATTTTACTTACC<br>GGACGCTATTAGCAGTG                          |
| 379 | 94  | CTTTAGCTGCATATTTACAACATGTTGACCTACAGCAAAGAA<br>TTCAGCAATTAAGCTCTAAGCCATCCGCAAAAATGACCTCTT<br>ATCAAAAGGA                               |
